# Supplementary material
Source: Springer Nature journal article supplement (https://www.springermedizin.de/resource/supplementary/12913_2012_2053_MOESM1_ESM.pdf/9529780)
Supplement: MOESM1 [file 9529780]

### Round 1

Ranking of 15 components

Additional components proposed by participants

Analysis of Round 1 to produce feedback in Round 2.

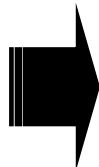

### Round 2

Ranking of 15 original components in light of feedback

Rating of the standard to which component should be delivered

Ranking of additional components

Analysis of Round 2 to produce feedback in Round 3.

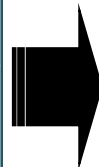

### Round 3

Final ranking of all measures in light of feedback:

The 15 original components,

The standard to which components should be delivered,

Additional components

Analysis of Round 3 to produce Delphi survey results.
